# Supplementary material for: Melatonin delays ovarian aging in mice by slowing down the exhaustion of ovarian reserve
Source: PubMed Central journal article supplement (PMC8102596; doi:10.1038/s42003-021-02042-z), 2021-05-06
Supplement: 42003_2021_2042_MOESM3_ESM.pdf [file 42003_2021_2042_MOESM3_ESM.pdf]

## Reporting Summary

Nature Research wishes to improve the reproducibility of the work that we publish. This form provides structure for consistency and transparency in reporting. For further information on Nature Research policies, see our [Editorial Policies](#) and the [Editorial Policy Checklist](#).

### Statistics

For all statistical analyses, confirm that the following items are present in the figure legend, table legend, main text, or Methods section.

n/a Confirmed

- The exact sample size ( $n$ ) for each experimental group/condition, given as a discrete number and unit of measurement
- A statement on whether measurements were taken from distinct samples or whether the same sample was measured repeatedly
- The statistical test(s) used AND whether they are one- or two-sided  
*Only common tests should be described solely by name; describe more complex techniques in the Methods section.*
- A description of all covariates tested
- A description of any assumptions or corrections, such as tests of normality and adjustment for multiple comparisons
- A full description of the statistical parameters including central tendency (e.g. means) or other basic estimates (e.g. regression coefficient) AND variation (e.g. standard deviation) or associated estimates of uncertainty (e.g. confidence intervals)
- For null hypothesis testing, the test statistic (e.g.  $F$ ,  $t$ ,  $r$ ) with confidence intervals, effect sizes, degrees of freedom and  $P$  value noted  
*Give  $P$  values as exact values whenever suitable.*
- For Bayesian analysis, information on the choice of priors and Markov chain Monte Carlo settings
- For hierarchical and complex designs, identification of the appropriate level for tests and full reporting of outcomes
- Estimates of effect sizes (e.g. Cohen's  $d$ , Pearson's  $r$ ), indicating how they were calculated

*Our web collection on [statistics for biologists](#) contains articles on many of the points above.*

### Software and code

Policy information about [availability of computer code](#)

Data collection: No commercial, open source and custom code were used

Data analysis: Data were analyzed as described in the Methods section. Statistical analyses were performed using GraphPad Prism 7 (GraphPad, San Diego, CA, USA).

For manuscripts utilizing custom algorithms or software that are central to the research but not yet described in published literature, software must be made available to editors and reviewers. We strongly encourage code deposition in a community repository (e.g. GitHub). See the Nature Research [guidelines for submitting code & software](#) for further information.

### Data

Policy information about [availability of data](#)

All manuscripts must include a [data availability statement](#). This statement should provide the following information, where applicable:

- Accession codes, unique identifiers, or web links for publicly available datasets
- A list of figures that have associated raw data
- A description of any restrictions on data availability

The RNA-sequencing data was are openly available in Zenodo (DOI: 10.5281/zenodo.3365397). Source data underlying plots shown in figures are provided in Supplementary Data 1. All other data are available upon reasonable request.

## Field-specific reporting

Please select the one below that is the best fit for your research. If you are not sure, read the appropriate sections before making your selection.

- Life sciences       Behavioural & social sciences       Ecological, evolutionary & environmental sciences

For a reference copy of the document with all sections, see [nature.com/documents/nr-reporting-summary-flat.pdf](https://www.nature.com/documents/nr-reporting-summary-flat.pdf)

## Life sciences study design

All studies must disclose on these points even when the disclosure is negative.

|                 |                                                                                                                                                                                                                                                                                                                                                                                                                                                                                                                                                                                                                                                                                                           |
|-----------------|-----------------------------------------------------------------------------------------------------------------------------------------------------------------------------------------------------------------------------------------------------------------------------------------------------------------------------------------------------------------------------------------------------------------------------------------------------------------------------------------------------------------------------------------------------------------------------------------------------------------------------------------------------------------------------------------------------------|
| Sample size     | Sample size was described in the figure legends.                                                                                                                                                                                                                                                                                                                                                                                                                                                                                                                                                                                                                                                          |
| Data exclusions | No data were excluded from the analyses.                                                                                                                                                                                                                                                                                                                                                                                                                                                                                                                                                                                                                                                                  |
| Replication     | The experimental techniques used in this study are all conventional techniques, and the experimental scheme and the reagents used are described in detail in EXPERIMENTAL PROCEDURES, which ensures the repeatability of this experiment on the technical level. The reproducibility was determined by using several biological replicates as indicated in the figure legends. Conclusions were not determined by a single detection technique, but by the combination of several experimental techniques from different perspectives. When performing histological analysis, we assigned three individuals who had not known grouping information to independently record, and obtained similar results. |
| Randomization   | Except for the study of the effect of SNAT knockout on follicle activation and ovarian aging, the mice used in the other experiments were randomly divided into groups                                                                                                                                                                                                                                                                                                                                                                                                                                                                                                                                    |
| Blinding        | When analyzing sections, the statistics of morphological indicators such as activated follicles, growing follicles, and locked follicles are easily disturbed by subjective wishes. Therefore, we require observers to perform statistics without knowing the grouping information. The other experimental data can either be accurately counted by observers or obtained through software analysis, so the observers were not blinded to group allocation during analysis.                                                                                                                                                                                                                               |

## Reporting for specific materials, systems and methods

We require information from authors about some types of materials, experimental systems and methods used in many studies. Here, indicate whether each material, system or method listed is relevant to your study. If you are not sure if a list item applies to your research, read the appropriate section before selecting a response.

### Materials & experimental systems

| n/a                                 | Involved in the study                                           |
|-------------------------------------|-----------------------------------------------------------------|
| <input type="checkbox"/>            | <input checked="" type="checkbox"/> Antibodies                  |
| <input checked="" type="checkbox"/> | <input type="checkbox"/> Eukaryotic cell lines                  |
| <input checked="" type="checkbox"/> | <input type="checkbox"/> Palaeontology and archaeology          |
| <input type="checkbox"/>            | <input checked="" type="checkbox"/> Animals and other organisms |
| <input checked="" type="checkbox"/> | <input type="checkbox"/> Human research participants            |
| <input checked="" type="checkbox"/> | <input type="checkbox"/> Clinical data                          |
| <input checked="" type="checkbox"/> | <input type="checkbox"/> Dual use research of concern           |

### Methods

| n/a                                 | Involved in the study                           |
|-------------------------------------|-------------------------------------------------|
| <input checked="" type="checkbox"/> | <input type="checkbox"/> ChIP-seq               |
| <input checked="" type="checkbox"/> | <input type="checkbox"/> Flow cytometry         |
| <input checked="" type="checkbox"/> | <input type="checkbox"/> MRI-based neuroimaging |

## Antibodies

Antibodies used

rabbit anti-SNAT polyclonal antibody, Abcam, cat: ab3505, lot: GR263544-10  
 rabbit anti-Akt polyclonal antibody, Cell Signaling Technology, cat: 9272S, lot: 27  
 rabbit anti-p-Akt monoclonal antibody, Cell Signaling Technology, cat: 4060S, lot: 23  
 rabbit anti-Eif4ebp1 polyclonal antibody, Cell Signaling Technology, cat: 9452S, lot: 12  
 rabbit anti-YAP monoclonal antibody, Cell Signaling Technology, cat: 14074S, lot: 4  
 rabbit anti-p-YAP monoclonal antibody, Cell Signaling Technology, cat: 13008S, lot: 5  
 rabbit anti-p-Eif4ebp1 polyclonal antibody, Cell Signaling Technology, cat: 9451S, lot: 14  
 rabbit anti-p70s6k1 polyclonal antibody, Cell Signaling Technology, cat: 9202S, lot: 20  
 rabbit anti-p-p70s6k1 polyclonal antibody, Cell Signaling Technology, cat: 9205S, lot: 21  
 rabbit anti-Foxo3 monoclonal antibody, Cell Signaling Technology, cat: 2497S, lot: 8  
 mouse anti- $\beta$ -actin monoclonal antibody, CWBiotech, cat: CW0096, lot: 01264/30339  
 mouse anti-GAPDH monoclonal antibody, CWBiotech, cat: CW0100, lot: 01225/50139  
 mouse anti-PCNA monoclonal antibody, Gene Tech, cat: GT2253  
 goat anti rabbit IgG, Servicebio Technology, cat: G1213  
 goat anti mouse IgG, Servicebio Technology, cat: G1214

goat anti rabbit IgG, Servicebio Technology, cat: GB21303  
goat Anti-mouse IgG (HRP), Biodragon-immunotech, cat: BF03001, lot: KIA7123684  
goat Anti-rabbit IgG (HRP), Biodragon-immunotech cat: BF03008, lot: KIA8011698

Validation

Any validation and relevant citations of all antibodies can be found on the manufacturers' website according to the catalog number.

## Animals and other organisms

Policy information about [studies involving animals](#); [ARRIVE guidelines](#) recommended for reporting animal research

Laboratory animals

Female C57BL/6 mice (0-11 months old) ; Female KM mice (0-4-weeks old).

Wild animals

No wild animals were used in this study.

Field-collected samples

No field-collected samples were used in this study.

Ethics oversight

All experiments and animal handling were conducted in accordance with the institutional guidelines for animal experimentation after obtaining prior approval from the Institutional Animal Ethics Committee of Huazhong Agricultural University (HZAUMO-2017-049).

Note that full information on the approval of the study protocol must also be provided in the manuscript.
