# Supplementary material for: Melatonin delays ovarian aging in mice by slowing down the exhaustion of ovarian reserve
Source: PubMed Central journal article supplement (PMC8102596; doi:10.1038/s42003-021-02042-z), 2021-05-06
Supplement: 42003_2021_2042_MOESM5_ESM.pdf [file 42003_2021_2042_MOESM5_ESM.pdf]

## Description of Additional Supplementary Files

**File name:** Supplementary Data 1

**Description:** The source data underlying plots in all Figures.
